# Supplementary material
Source: PubMed Central journal article supplement (PMC3518120)
Supplement: supp_M112.020503_mcp.M112.020503-1.pdf [file supp_M112.020503_mcp.M112.020503-1.pdf]

### **Supporting Information (Sarkar et al.)**

Supporting information includes two supplemental figures and nine supplemental tables (provided in .xlsx format). Additionally, annotated spectra for all single peptide identifications are provided in a .zip file.

### **Supplemental Figure**

**Supplemental Figure 1:** Non-redundant peptide analysis shows that 40-45% of peptides identified in H1, H1-blank, H9-blank and MEF subcellular fractions are associated with secretory pathway organelles (GO:0005783, GO:0005793, GO:0030134, GO:0005794, GO:0030141, GO:0030133, GO:0005840) and extracellular proteins (GO:0031012, GO:0005576, GO:0044421, GO:0005615, GO:0005578).

**Supplemental Figure 2:** A) H1 cells grown in MEF-CM, B) H1 cells exposed to unconditioned hESC medium for 1 day, C) H9 cells grown in MEF-CM and D) H9 cells exposed to unconditioned hESC medium for 1 day, were analyzed for OCT4 and SSEA4 expression using flow cytometry.

### **Supplemental Tables**

**Supplemental Table 1:** Protein lists obtained upon MS analysis of secretory pathway organelles from H1 hESCs, H9 hESCs, H1 hESCs exposed to unconditioned medium for 24 hours (H1-blank), H9 hESCs exposed to unconditioned medium for 24 hours (H9-blank) and MEFs.

**Supplemental Table 2:** Peptide list for matched peptides in H1, H9, H1-blank and H9-blank samples.

**Supplemental Table 3:** Peptide list for matched peptides in MEF sample.

**Supplemental Table 4:** List of non-redundant peptides and corresponding spectral counts obtained in three technical replicates, during analysis of whole cell lysate and subcellular fractions from H9 hESCs.

**Supplemental Table 5:** Detailed analysis for enrichment or depletion of specific organelles in subcellular fractions relative to whole cell lysate

**Supplemental Table 6:** List of non-redundant peptides identified in H1, H1-blank, H9-blank and MEF samples, and corresponding spectral counts. Data shown correspond to the total spectral counts for each peptide cumulatively obtained in three technical replicates

**Supplemental Table 7:** List of extracellular proteins identified in MEFs.

**Supplemental Table 8:** List of extracellular proteins identified in both H1 and H9 hESCs.

**Supplemental Table 9:** List of proteins with statistically significant changes in NSAF values upon comparing H1 with H1-blank and H9 with H9-blank.

| <b>MEF</b> | <b>H1</b> | <b>H1-blank</b> | <b>H9-blank</b> |
|------------|-----------|-----------------|-----------------|
| 44.09%     | 42.39%    | 41.73%          | 42.27%          |

Supplemental Fig. 1

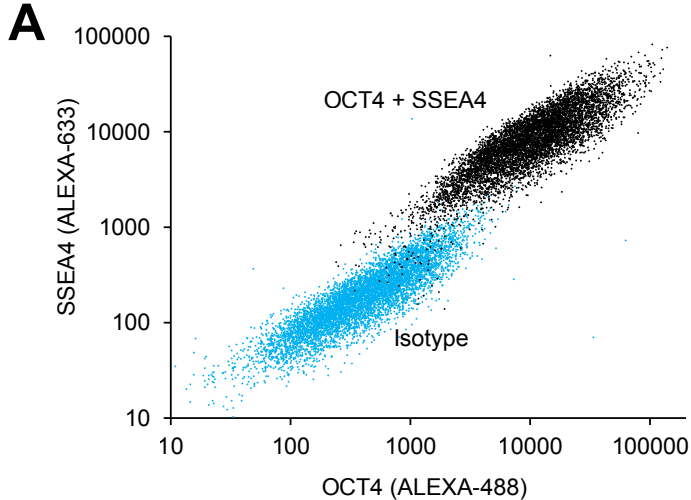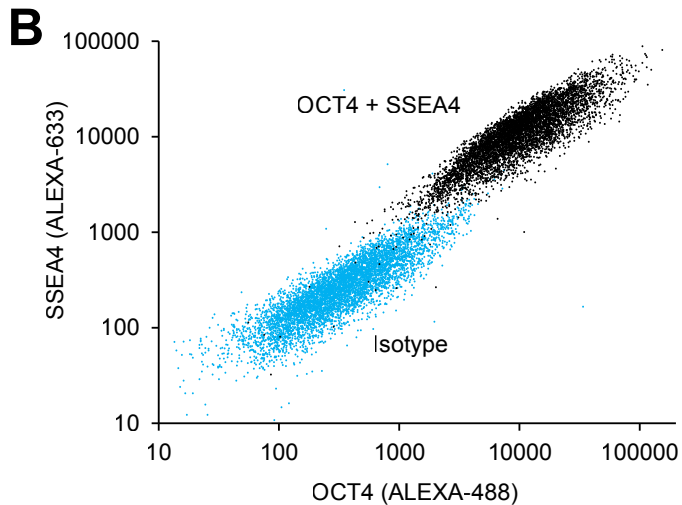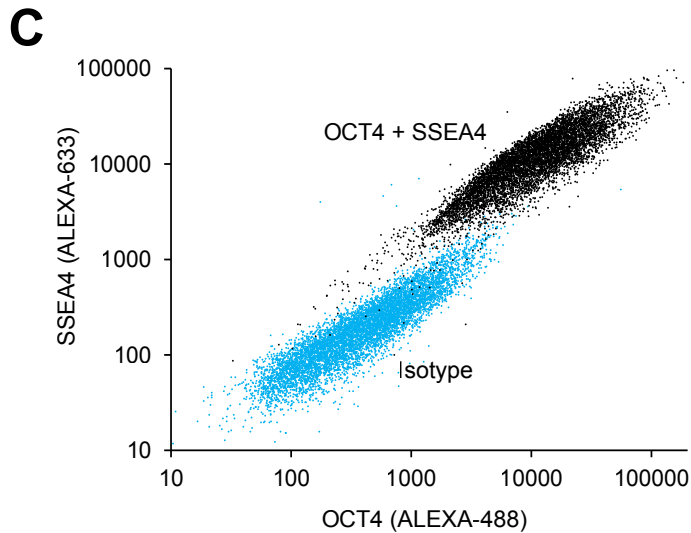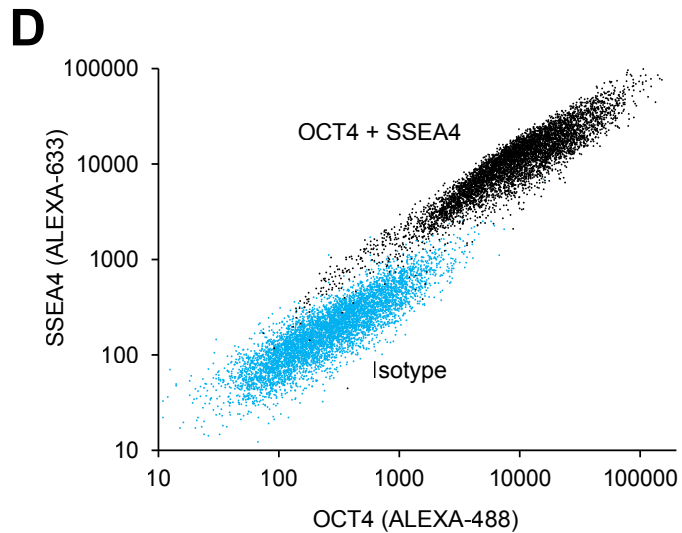

Supplemental Fig. 2
